# Supplementary material
Source: publisher figshare collection journal article supplement (https://sage.figshare.com/ndownloader/files/24120374)
Supplement: Supplementary file 1 [file 24120374]

## **Supplementary Methods**

### **Statistical Analyses**

#### *Cluster Analysis*

Cluster analysis is frequently used to generate typologies for the express purpose of improving the design and delivery of services and interventions (Adlaf & Zdanowicz, 1999) and is particularly applicable if a population has multiple needs or complicated characteristics (Larsson et al., 2017). This technique has been successfully used to examine patterns of participation in an Australian general community sample (Berry, Rodgers & Dear, 2007; Berry, 2008a, 2008b).

To assist in determining an appropriate cut-point in the agglomeration schedule for the number of clusters, the ratio of change in the agglomeration schedule from step to step in the clustering process was calculated, with the number of clusters selected at the point of a large gap in the distance coefficient. The average silhouette measure of cohesion and separation (range from  $-1$  to  $+1$ ) was used to indicate overall goodness of fit. Positive values indicate that the average distance between cases in a cluster is smaller than the average distance to cases in other clusters and are, thus, desirable (Rousseeuw, 1987). A generally accepted criterion is that if the silhouette measure is  $<0.2$ , then the quality of the average silhouette measure across the whole sample is considered poor, between  $0.2$  and  $0.5$  indicates a fair solution and  $>0.5$  is a good solution (Mooi & Sarstedt, 2011).

### **Supplementary References**

- Adlaf, E. M., & Zdanowicz, Y. M. (1999). A cluster-analytic study of substance problems and mental health among street youths. *The American Journal of Drug and Alcohol Abuse*, 25(4), 639-660. doi:10.1081/ADA-100101884
- Berry, H. (2008a). Twelve types of Australians and their socio-economic, psychosocial and health profiles. *Australian Government Department of Families, Community Services and Indigenous Affairs, Canberra*.
- Berry, H. L. (2008b). Social capital elite, excluded participators, busy working parents and aging, participating less: types of community participators and their mental health. *Social Psychiatry and Psychiatric Epidemiology*, 43(7), 527-537. doi:10.1007/s00127-008-0331-3.
- Berry, H. L., Rodgers, B., & Dear, K. B. (2007). Preliminary development and validation of an Australian community participation questionnaire: Types of participation and associations with distress in a coastal community. *Social science & medicine*, 64(8), 1719-1737. doi:10.1016/j.socscimed.2006.12.009.
- Larsson, S. C., Traylor, M., Malik, R., Dichgans, M., Burgess, S., & Markus, H. S. (2017). Modifiable pathways in Alzheimer's disease: Mendelian randomisation analysis. *Bmj*, 359, j5375. doi:10.1136/bmj.j5375
- Rousseeuw, P. J. (1987). Silhouettes: A graphical aid to the interpretation and validation of cluster analysis. *Journal of Computational and Applied Mathematics*, 20, 53-65. doi:https://doi.org/10.1016/0377-0427(87)90125-7
- Mooi, E., & Sarstedt, M. (2011). *A concise guide to market research: The process, data, and methods using IBM SPSS Statistics*. New York: Springer.

**Supplementary Table 1. Factor loadings for three service groupings in community aged care**

|                           | Personal<br>Assistive<br>Care | Domestic<br>Assistive<br>Care | Medication<br>and<br>Transport | Social<br>Support | Activity<br>Centre |
|---------------------------|-------------------------------|-------------------------------|--------------------------------|-------------------|--------------------|
| Activity Centre           |                               | -.41                          | .25                            | -.31              | .56                |
| Domestic Assistance       |                               | .55                           |                                |                   |                    |
| Meal Services Preparation | .47                           |                               |                                |                   |                    |
| Medication Assistance     |                               |                               | .45                            |                   |                    |
| Nursing Services          | .35                           |                               |                                | .33               | .26                |
| Outings                   |                               |                               |                                |                   |                    |
| Personal Care             | .80                           |                               |                                |                   |                    |
| Respite Home              |                               |                               | .54                            |                   |                    |
| Shopping                  |                               | .60                           |                                |                   |                    |
| Social Support            |                               |                               |                                | .46               |                    |
| Transport                 |                               | .38                           | .57                            |                   |                    |
| <b>Eigenvalues</b>        | 2.17                          | 1.49                          | 1.31                           | 1.03              | 1.01               |
| <b>% of variance</b>      | 18.1                          | 12.4                          | 10.9                           | 8.6               | 8.4                |

Note. Factor loadings <.2 are suppressed.

**Supplementary Table 2. Agglomeration schedules and ratios of change for a cluster analysis of clients using Schwarz's Bayesian Criterion and Akaike's Information Criterion**

| Number of clusters | Schwarz's Bayesian Criterion |                 | Akaike's Information Criterion |                 |
|--------------------|------------------------------|-----------------|--------------------------------|-----------------|
|                    | Criterion statistic          | Ratio of change | Criterion statistic            | Ratio of change |
| 1                  | 8895.680                     |                 | 8861.917                       |                 |
| 2                  | 7525.792                     | 1.000           | 7458.266                       | 1.000           |
| 3                  | 7014.297                     | 0.373           | 6913.008                       | 0.388           |
| 4                  | 6564.422                     | 0.328           | 6429.370                       | 0.345           |
| 5                  | 6181.122                     | 0.280           | 6012.307                       | 0.297           |
| 6                  | 5898.705                     | 0.206           | 5696.127                       | 0.225           |
| 7                  | 5621.193                     | 0.203           | 5384.852                       | 0.222           |
| 8                  | 5385.535                     | 0.172           | 5115.431                       | 0.192           |
| 9                  | 5182.589                     | 0.148           | 4878.722                       | 0.169           |
| 10                 | 4996.222                     | 0.136           | 4658.592                       | 0.157           |

Note: Line in table indicates cut-off point

**Supplementary Figure 1. Australian Community Participation Questionnaire (ACPQ-SF15)**

| <b>The Australian Community Participation Questionnaire (ACPQ)</b>                                                                                                                                                                                           |                              |                                    |                                 |                             |                                  |                                                |             |
|--------------------------------------------------------------------------------------------------------------------------------------------------------------------------------------------------------------------------------------------------------------|------------------------------|------------------------------------|---------------------------------|-----------------------------|----------------------------------|------------------------------------------------|-------------|
| These questions ask how often you see other people or get involved in different activities in your neighbourhood or community. Please tick the number below each statement that is closest to your client's opinion and supply the code on the right column. |                              |                                    |                                 |                             |                                  |                                                |             |
| Never, or almost never                                                                                                                                                                                                                                       | Rarely                       | Occasionally                       | Sometimes                       | Quite often                 | Very often                       | Always, or almost always                       |             |
| 1                                                                                                                                                                                                                                                            | 2                            | 3                                  | 4                               | 5                           | 6                                | 7                                              |             |
| <b>Contact with immediate household</b>                                                                                                                                                                                                                      |                              |                                    |                                 |                             |                                  |                                                | <b>CODE</b> |
| I see people in my immediate household at the start of my day                                                                                                                                                                                                |                              |                                    |                                 |                             |                                  |                                                | Q1          |
| <input type="radio"/> Never, or almost never                                                                                                                                                                                                                 | <input type="radio"/> Rarely | <input type="radio"/> Occasionally | <input type="radio"/> Sometimes | <input type="radio"/> Often | <input type="radio"/> Very often | <input type="radio"/> Always, or almost always |             |
| I eat my main meal with people in my immediate household                                                                                                                                                                                                     |                              |                                    |                                 |                             |                                  |                                                | Q2          |
| <input type="radio"/> Never, or almost never                                                                                                                                                                                                                 | <input type="radio"/> Rarely | <input type="radio"/> Occasionally | <input type="radio"/> Sometimes | <input type="radio"/> Often | <input type="radio"/> Very often | <input type="radio"/> Always, or almost always |             |
| <b>Contact with extended family</b>                                                                                                                                                                                                                          |                              |                                    |                                 |                             |                                  |                                                |             |
| I see members of my extended family in person                                                                                                                                                                                                                |                              |                                    |                                 |                             |                                  |                                                | Q3          |
| <input type="radio"/> Never, or almost never                                                                                                                                                                                                                 | <input type="radio"/> Rarely | <input type="radio"/> Occasionally | <input type="radio"/> Sometimes | <input type="radio"/> Often | <input type="radio"/> Very often | <input type="radio"/> Always, or almost always |             |
| I spend time doing things with people in my extended family                                                                                                                                                                                                  |                              |                                    |                                 |                             |                                  |                                                | Q4          |
| <input type="radio"/> Never, or almost never                                                                                                                                                                                                                 | <input type="radio"/> Rarely | <input type="radio"/> Occasionally | <input type="radio"/> Sometimes | <input type="radio"/> Often | <input type="radio"/> Very often | <input type="radio"/> Always, or almost always |             |
| <b>Contact with friends</b>                                                                                                                                                                                                                                  |                              |                                    |                                 |                             |                                  |                                                |             |
| I make time to keep in touch with my friends                                                                                                                                                                                                                 |                              |                                    |                                 |                             |                                  |                                                | Q5          |
| <input type="radio"/> Never, or almost never                                                                                                                                                                                                                 | <input type="radio"/> Rarely | <input type="radio"/> Occasionally | <input type="radio"/> Sometimes | <input type="radio"/> Often | <input type="radio"/> Very often | <input type="radio"/> Always, or almost always |             |
| My friends come over to my place or I go to theirs                                                                                                                                                                                                           |                              |                                    |                                 |                             |                                  |                                                | Q6          |
| <input type="radio"/> Never, or almost never                                                                                                                                                                                                                 | <input type="radio"/> Rarely | <input type="radio"/> Occasionally | <input type="radio"/> Sometimes | <input type="radio"/> Often | <input type="radio"/> Very often | <input type="radio"/> Always, or almost always |             |
| <b>Contact with neighbours</b>                                                                                                                                                                                                                               |                              |                                    |                                 |                             |                                  |                                                |             |
| My neighbours tell me their news or I tell them mine                                                                                                                                                                                                         |                              |                                    |                                 |                             |                                  |                                                | Q7          |
| <input type="radio"/> Never, or almost never                                                                                                                                                                                                                 | <input type="radio"/> Rarely | <input type="radio"/> Occasionally | <input type="radio"/> Sometimes | <input type="radio"/> Often | <input type="radio"/> Very often | <input type="radio"/> Always, or almost always |             |
| I chat with my neighbours                                                                                                                                                                                                                                    |                              |                                    |                                 |                             |                                  |                                                | Q8          |
| <input type="radio"/> Never, or almost never                                                                                                                                                                                                                 | <input type="radio"/> Rarely | <input type="radio"/> Occasionally | <input type="radio"/> Sometimes | <input type="radio"/> Often | <input type="radio"/> Very often | <input type="radio"/> Always, or almost always |             |
| <b>Religious observance</b>                                                                                                                                                                                                                                  |                              |                                    |                                 |                             |                                  |                                                |             |
| I make time to attend services at a place of worship                                                                                                                                                                                                         |                              |                                    |                                 |                             |                                  |                                                | Q9          |
| <input type="radio"/> Never, or almost never                                                                                                                                                                                                                 | <input type="radio"/> Rarely | <input type="radio"/> Occasionally | <input type="radio"/> Sometimes | <input type="radio"/> Often | <input type="radio"/> Very often | <input type="radio"/> Always, or almost always |             |
| I go to prayer meetings with others who share my beliefs                                                                                                                                                                                                     |                              |                                    |                                 |                             |                                  |                                                | Q10         |
| <input type="radio"/> Never, or almost never                                                                                                                                                                                                                 | <input type="radio"/> Rarely | <input type="radio"/> Occasionally | <input type="radio"/> Sometimes | <input type="radio"/> Often | <input type="radio"/> Very often | <input type="radio"/> Always, or almost always |             |
| <b>Organised community activities</b>                                                                                                                                                                                                                        |                              |                                    |                                 |                             |                                  |                                                |             |
| I take an active part in organised group activities in my community                                                                                                                                                                                          |                              |                                    |                                 |                             |                                  |                                                | Q11         |
| <input type="radio"/> Never, or almost never                                                                                                                                                                                                                 | <input type="radio"/> Rarely | <input type="radio"/> Occasionally | <input type="radio"/> Sometimes | <input type="radio"/> Often | <input type="radio"/> Very often | <input type="radio"/> Always, or almost always |             |
| I am an active member of at least one sporting, hobby or community-based club or association                                                                                                                                                                 |                              |                                    |                                 |                             |                                  |                                                | Q12         |
| <input type="radio"/> Never, or almost never                                                                                                                                                                                                                 | <input type="radio"/> Rarely | <input type="radio"/> Occasionally | <input type="radio"/> Sometimes | <input type="radio"/> Often | <input type="radio"/> Very often | <input type="radio"/> Always, or almost always |             |
| I attend events that bring people together such as fetes, shows, festivals, or other community events                                                                                                                                                        |                              |                                    |                                 |                             |                                  |                                                | Q13         |
| <input type="radio"/> Never, or almost never                                                                                                                                                                                                                 | <input type="radio"/> Rarely | <input type="radio"/> Occasionally | <input type="radio"/> Sometimes | <input type="radio"/> Often | <input type="radio"/> Very often | <input type="radio"/> Always, or almost always |             |
| <b>Active interest in current affairs</b>                                                                                                                                                                                                                    |                              |                                    |                                 |                             |                                  |                                                |             |
| I talk about current affairs with others                                                                                                                                                                                                                     |                              |                                    |                                 |                             |                                  |                                                | Q14         |
| <input type="radio"/> Never, or almost never                                                                                                                                                                                                                 | <input type="radio"/> Rarely | <input type="radio"/> Occasionally | <input type="radio"/> Sometimes | <input type="radio"/> Often | <input type="radio"/> Very often | <input type="radio"/> Always, or almost always |             |
| I read articles in the paper about national and international affairs                                                                                                                                                                                        |                              |                                    |                                 |                             |                                  |                                                | Q15         |
| <input type="radio"/> Never, or almost never                                                                                                                                                                                                                 | <input type="radio"/> Rarely | <input type="radio"/> Occasionally | <input type="radio"/> Sometimes | <input type="radio"/> Often | <input type="radio"/> Very often | <input type="radio"/> Always, or almost always |             |
